# Supplementary material
Source: publisher site journal article supplement (https://www.dovepress.com/article/584402)
Supplement: Supplementary file 1 [file 584402%20Revised%20Supplementary%20Material.docx]

**Supplementary Material 1**

**Study Protocol**

**Antiemetic Prophylaxis with Fosaprepitant versus Ondansetron in Patients Undergoing V**ideo-Assisted Thoracoscopic Surgery****

*A Randomized Clinical Trial*

**Introduction**

Postoperative nausea and vomiting (PONV) remains one of the most common and distressing complications after general anesthesia, with an incidence of approximately 30% in the general surgical population and up to 80% among high-risk patients.1,2 PONV can significantly impair recovery by delaying early oral intake and mobilization, decreasing patient satisfaction, and reducing quality of life.2-4 It also increases the risk of aspiration, thereby elevating the incidence of pulmonary infections.5,6 Effective management of PONV aligns with the goals of Enhanced Recovery After Surgery (ERAS) protocols, aiming to optimize postoperative outcomes and minimize perioperative complications.7

V**ideo-assisted thoracoscopic surgery**, due to its high invasiveness and marked physiological stress response, often requires the use of high-dose opioid analgesics for adequate postoperative pain management.8,9 Opioid use has been confirmed as a major risk factor for PONV.10,11 Consequently, patients undergoing v**ideo-assisted thoracoscopic surgery** are at a particularly elevated risk of PONV, which may further contribute to postoperative pulmonary complications. Effective control of PONV not only alleviates symptoms but also facilitates early mobilization, improves respiratory function, reduces the need for rescue antiemetics, shortens hospital stays, and ultimately enhances patient satisfaction and quality of life.2,3,12,13

The occurrence of PONV is mediated by complex neurochemical pathways involving various neurotransmitters, including dopaminergic, cholinergic, histaminergic, serotonergic, and neurokinin-1 (NK₁) systems.13,14 Currently, 5-HT₃ receptor antagonists, such as ondansetron, are the first-line pharmacological agents for PONV management due to their favorable safety profile and minimal side effects.1,15 Ondansetron exerts its antiemetic effects by blocking afferent signals from the gastrointestinal vagus nerve and central 5-HT₃ receptors.5 Clinical guidelines recommend combining dexamethasone with a 5-HT₃ receptor antagonist for PONV prophylaxis.3,4 While this dual therapy reduces the incidence of PONV by approximately 25%, its efficacy remains suboptimal in moderate to high-risk patients.5,16 This limitation is primarily due to the single mechanism of action of ondansetron, which fails to address the multifactorial nature of PONV.13,14,17,18 Moreover, ondansetron's relatively short half-life (3-5 hours) may not provide adequate coverage during the prolonged postoperative period when PONV risk is elevated.19 Therefore, more effective prophylactic strategies are urgently needed for moderate to high-risk patients. Fosaprepitant, a prodrug of aprepitant, is a potent NK-1 receptor antagonist that has demonstrated significant efficacy in preventing chemotherapy-induced nausea and vomiting (CINV) as well as PONV.20,21 Fosaprepitant’s longer half-life and broader mechanism of action make it a promising candidate for PONV prevention in high-risk populations.4,21,22

Despite its potential, direct comparative evidence regarding the efficacy of fosaprepitant versus ondansetron in v**ideo-assisted thoracoscopic surgery** patients remains limited. To fill this knowledge gap, the present study plans to conduct a prospective, single-center, randomized, double-blind trial comparing the efficacy of fosaprepitant plus dexamethasone versus ondansetron plus dexamethasone in preventing PONV among patients undergoing elective v**ideo-assisted thoracoscopic surgery**. Patients at moderate to high risk, as determined by the Apfel score, will be enrolled in the study.2,9 We hypothesize that fosaprepitant will provide superior prophylactic efficacy compared to ondansetron, with secondary benefits including reduced postoperative pulmonary complications, shorter hospital stays, and improved postoperative quality of life. The results of this trial may provide valuable evidence for optimizing perioperative antiemetic strategies in high-risk v**ideo-assisted thoracoscopic surgery** patients.

**Methods: participants, interventions and outcomes**

**Study setting**

This prospective, single-center, randomized, double-blind, controlled clinical trial will be conducted at the Qilu Hospital of Shandong University in China.

**Eligibility criteria**

*Inclusion Criteria*

To be eligible for this study, patients must have met all of the following criteria:

1. ASA physical status I-III.
2. Age 18-70 years.
3. Scheduled for thoracoscopic partial or lobar lung resection under general anesthesia.
4. Apfel risk score≥2 (based on four predictors: female sex, history of PONV and/or motion sickness, non-smoking status, and postoperative opioid use. Patients with 0–1, 2, and 3–4 risk factors are considered to be at low, moderate, and high risk of PONV, respectively).

*Exclusion Criteria*

Patients that meet any of the following criteria will be excluded from this study:

1. Nausea or vomiting within 24 hours prior to surgery.
2. Use of antiemetic medications, steroids, or psychotropic drugs within 24 hours prior to surgery.
3. Cognitive impairment.
4. Severe hepatic or renal dysfunction.
5. Morbid obesity (BMI>35 kg m-²).
6. Known allergy to fosaprepitant, ondansetron, or dexamethasone.
7. Pregnancy or breastfeeding.

*Withdrawal Criteria*

Patients will be withdrawn from the study if they express an unwillingness to participate before anesthesia induction.

**Interventions**

1. Anesthesia Management Protocol: All patients will receive a standardized anesthesia regimen consisting of general anesthesia combined with thoracic paravertebral nerve block. Perioperative monitoring will include ECG, heart rate, oxygen saturation (SpO₂), body temperature, bispectral index (BIS), end-tidal carbon dioxide (EtCO₂), and end-tidal anesthetic gas concentration. Anesthetic agents will be titrated to maintain the BIS value between 40 and 60 throughout the procedure.
2. Anesthesia Induction: Preoxygenation with 100% oxygen will be performed for 5 minutes prior to induction. General anesthesia will be induced with midazolam (0.03–0.05 mg kg-1), sufentanil (0.3–0.5 μg kg-1), etomidate (0.2–0.3 mg kg-1), and a neuromuscular blocking agent (rocuronium 0.6–1.0 mg kg-1). Endotracheal intubation will be performed using a single-lumen tube with an internal diameter of 7.5–8.0 mm. A size 9 bronchial blocker will be placed in the operative-side bronchus, and its position will be confirmed using a fiberoptic bronchoscope. Following intubation, 5 mg of dexamethasone will be administered intravenously.
3. The fosaprepitant (Qilu Pharmaceutical Co., Ltd., China) group will receive a single intravenous dose of 150 mg administered 30 minutes before surgery, whereas the ondansetron (Qilu Pharmaceutical Co., Ltd., China) group will receive 8 mg intravenously 30 minutes prior to the end of surgery. To maintain blinding, 100 ml of 0.9% saline will be administered at alternate time points.
4. Ventilation and Respiratory Parameters Volume-controlled ventilation will be applied.
5. During two-lung ventilation (TLV), tidal volume will be set at 8 ml kg-1 of ideal body weight.
6. During one-lung ventilation (OLV), tidal volume will be set at 6 ml kg-1 of ideal body weight.
7. Positive end-expiratory pressure (PEEP) will be maintained between 5 and 8 cmH₂O.
8. Fraction of inspired oxygen (FiO₂) will be set at 40–50% during TLV and 60–100% during OLV, adjusted to maintain SpO₂ above 90%.
9. Respiratory rate will be adjusted to maintain EtCO₂ between 35 and 45 mmHg.

Lung recruitment maneuvers: After intubation and at the end of OLV, a sustained inflation of 30 cmH₂O will be applied for 15–20 seconds. Following OLV, the ventilated lung will also receive a sustained inflation at 20 cmH₂O for 15–20 seconds.

1. In the event of intraoperative hypoxemia (SpO₂<90% or arterial partial pressure of oxygen [PaO₂]<60 mmHg), potential causes such as hemodynamic instability, airway issues, and displacement of the bronchial blocker will first be excluded. If hypoxemia persists despite increasing FiO₂ and adjusting ventilation parameters within safe limits, an additional airway pressure of 5 cmH₂O may be applied to the non-ventilated lung. Circulatory management: Mean arterial pressure (MAP) will be maintained between 70 and 100 mmHg, and heart rate between 50 and 100 beats per minute. Vasopressor agents will be administered as needed to maintain hemodynamic stability. Invasive arterial blood pressure (ABP) monitoring will be employed to assess circulatory changes. A restrictive fluid management strategy will be adopted, targeting a urine output of >0.5 ml kg-1 h-1. If urine output falls below 0.5 ml kg-1 h-1, a bolus of 250 ml crystalloid solution will be administered over 10 minutes. All patients will routinely receive reversal of neuromuscular blockade postoperatively.
2. Postoperative Multimodal Analgesia Protocol: Postoperative analgesia will consist of intravenous patient-controlled analgesia (IV-PCA) combined with flurbiprofen axetil 50 mg administered every 12 hours. Additional analgesics will be provided as needed upon patient request, except in cases of contraindications.

7. Rescue Antiemetic Therapy: For patients requiring rescue antiemetic treatment postoperatively, an intramuscular injection of metoclopramide 10 mg will be administered. Rescue antiemetics will be given according to predefined criteria, including patient request or the occurrence of moderate-to-severe nausea or vomiting (VAS≥5), and will be applied uniformly across both study groups.

**Outcomes**

*Primary Outcomes*

Incidence of PONV at 24h postoperatively.

*Secondary Outcomes*

1. PONV incidence at 6, 12, 48h.

(2) The severity of PONV at 6, 12, 24, and 48h after surgery.

(3) The proportion of patients requiring rescue antiemetic medication at each time point and cumulatively within 48h.

(4) Drug-related adverse events (e.g., constipation, headache, dizziness).

(5) PPCs.

(6) Duration of hospital stay.

(7) Time to chest drain removal.

**Sample size calculation**

Based on a literature-based meta-analysis, the incidence of postoperative vomiting following prophylactic use of ondansetron is estimated to be approximately 22%. The incidence in the fosaprepitant group will be assumed to be 7%. Using PASS version 15.0 software, with a two-sided alpha (α) of 0.05, statistical power of 90%, and an anticipated dropout rate of 5%, the total sample size will be calculated to be 234 participants.

**Recruitment**

Recruitment for the study was planned among the inpatients of Qilu Hospital of Shandong University, beginning in October 2023 and concluding in April 2024. The final follow-up was expected to be completed by May 2024, and the entire study was anticipated to end by June 2024.

**Assignment of interventions: allocation**

**Sequence generation**

An independent investigator will use a computer-generated random number sequence to allocate qualified participants to either the fosaprepitant group or the ondansetron group in a 1:1 ratio.

**Concealment mechanism**

The allocation information will be kept secret through numbered, opaque-sealed envelopes. The envelopes will be stored securely throughout the study and opened by the researchers when the participant arrives in the operating room.

**Implementation**

On the day of surgery, the sequentially numbered opaque envelopes will be handed to the attending anesthesiologist by an independent investigator.

**Assignment of interventions: blinding**

To ensure blinding, study drugs (fosaprepitant 150 mg, ondansetron 8 mg, or placebo saline) will be prepared in identical 100 ml 0.9% saline infusion bags by anesthesia assistants who will not be involved in patient care or study procedures. Each infusion bag will be sealed in an opaque, sequentially numbered envelope labeled ‘antiemetic medication’ and will be delivered to the anesthesiologist immediately prior to administration. All individuals involved in the study, including anesthesiologists, outcome assessors, clinical staff administering rescue antiemetics, statisticians, and participants, will remain blinded to group allocation throughout the study.

**Data collection and management**

Baseline patient data will be collected on the day before surgery by an independent researcher after institutional approval. Collected demographic information will include age, sex, education level, weight, height, and BMI. Medical history such as hypertension, diabetes, smoking and drinking habits, prior PONV, chemotherapy (adjuvant, neoadjuvant, palliative), and radiotherapy will be recorded. Preoperative pulmonary function tests including FEV1:FVC ratio and MVV will be performed. Functional status will be assessed using the Karnofsky Performance Status (KPS) scale.

Anesthesia and surgery-related data will be collected and will include anesthesia type and duration, surgery duration, doses of anesthetics (sufentanil, remifentanil, others), use of vasoactive drugs, intraoperative blood loss, fluid and blood transfusions, and whether thoracoscopic surgery will be converted to open thoracotomy. Pathological diagnosis (squamous carcinoma, adenocarcinoma, benign), and tumor staging (T1-4, N0-2) will be documented.

PONV will be assessed using the VAS at 6, 12, 24, and 48 hours postoperatively, with severity to be categorized as mild (1–4), moderate (5–6), and severe (7–10). The Rhodes INVR will also be administered at 6, 12, 24, and 48 hours after surgery. Additional postoperative data will include headache, gastrointestinal recovery parameters (time to first flatus, bowel movement, constipation), dizziness, intravenous phlebitis, use of rescue analgesics and antiemetics, ambulation status, sleep quality to be assessed by the Richards-Campbell Sleep Questionnaire (RCSQ), and Quality of Recovery-15 (QoR-15) scores.

Postoperative complications including pulmonary, renal, cardiac, and surgical complications will be recorded, along with drainage tube removal time and length of hospital stay.

All data will be collected using paper case report forms and will be securely stored in accordance with institutional data protection policies. To ensure accuracy, data will be double-entered independently by two trained researchers and will be cross-checked manually. A unique alphanumeric study ID will be assigned to each participant to maintain confidentiality, with personal identifiers to be stored separately from research data throughout the study period.

**Statistical methods**

Statistical analyses will be performed using SPSS software (version 25.0; IBM Corp., Armonk, NY, USA). Patient characteristics will be summarized based on variable type. Continuous variables will be reported as mean±SD for normally distributed data or as median [IQR] for non-normally distributed data. Categorical variables will be described as frequencies and percentages.

Between-group comparisons will be conducted using independent-samples t-tests for normally distributed continuous variables and the Mann–Whitney U test for non-normally distributed data. Categorical variables will be compared using the chi-square test or Fisher’s exact test, as appropriate. All tests will be two-sided, and a *P*-value<0.05 will be considered statistically significant.

When the event count was zero in one group, the Haldane–Anscombe continuity correction will be applied to stabilize the OR estimates. All analyses will follow the intention-to-treat (ITT) principle, in which all randomized participants will be included in the final analysis regardless of protocol adherence.

A binary logistic regression model will be used to further explore potential predictors of PONV. Univariate logistic regression will first be performed to assess the association with 24-hour PONV incidence. A multivariable logistic regression model will be constructed, including all variables with a *P*-value<0.20 from the univariate analysis, as well as commonly reported demographic and baseline clinical variables (age, BMI, and hypertension). In the multivariable analysis, a *P*-value<0.05 will be considered statistically significant. Adjusted OR and corresponding 95% CI will be reported.

**Oversight and monitoring**

**Composition of the coordinating center and trial steering committee**

The study research team will be responsible for conducting the trial. The principal investigator is in charge of supervising the trial and making sure that it adheres to the study protocol.

**Composition of the data monitoring committee, its role, and reporting structure**

The principal investigator will conduct regular reviews of the data and trial progress every three weeks; this study has no data monitoring committee.

**Adverse event reporting and harms**

Assessing safety during anesthesia will involve tracking vital signs and noting any adverse events (AEs) or serious adverse events (SAEs). Any undesirable medical event for a patient, regardless of its connection to the research protocol, is referred to as an adverse event.

**Frequency and plans for auditing trial conduct**

Annually, the research office and ethics committee of the department will audit the study, while the principal investigator will assess the accuracy of the data and the trial's progression every three weeks.

**Plans for communicating important protocol amendments to relevant parties (e.g., trail participants, ethical committees)**

The principal investigator is in charge of any protocol modifications and their implementation. The necessary modifications must be approved by the ethics committee before they can be applied. The principal investigator is responsible for communicating the changes to the protocol and ensuring that all study personnel are properly trained in regard to the amendments.

**Dissemination plans**

All participants will be required to give written consent before any protocol-specified procedures or assessments are conducted. The research results will be compiled into a manuscript and submitted to an international peer-reviewed medical journal to facilitate the scientific dissemination of the findings.

**Reference:**

1. Gan TJ, Diemunsch P, Habib AS, et al. Consensus guidelines for the management of postoperative nausea and vomiting. *Anesth Analg*. Jan 2014;118(1):85-113. doi:10.1213/ANE.0000000000000002

2. Goldson KV, Brennan E, Burton BN, et al. Does Management of Postoperative Nausea and Vomiting Differ by Patient Demographics? An Evaluation of Perioperative Anesthetic Management-An Observational Study. *Anesthesiology*. Apr 1 2025;142(4):704-715. doi:10.1097/ALN.0000000000005367

3. Gan TJ, Belani KG, Bergese S, et al. Fourth Consensus Guidelines for the Management of Postoperative Nausea and Vomiting. *Anesth Analg*. Aug 2020;131(2):411-448. doi:10.1213/ANE.0000000000004833

4. Huang Q, Wang F, Liang C, et al. Fosaprepitant for postoperative nausea and vomiting in patients undergoing laparoscopic gastrointestinal surgery: a randomised trial. *Br J Anaesth*. Oct 2023;131(4):673-681. doi:10.1016/j.bja.2023.06.029

5. Christian C. Apfel MD, Kari Korttila, F.R.C.A., Ph.D., Mona Abdalla, Ph.D., Heinz Kerger, M.D., , Alparslan Turan MD, Ina Vedder, M.D., Carmen Zernak, M.D., Klaus Danner, M.D., Ritva Jokela, M.D., Ph.D., , Stuart J. Pocock PD, Stefan Trenkler, M.D., Markus Kredel, M.D., Andreas Biedler, M.D., Daniel I. Sessler, M.D., , and Norbert Roewer MD, for the IMPACT Investigators. A Factorial Trial of Six Interventions for the Prevention of Postoperative Nausea and Vomiting. *N Engl J*. Med 2004;350:2441-51. doi:10.1056/NEJMoa032196

6. Griffiths JD, Gyte GM, Popham PA, et al. Interventions for preventing nausea and vomiting in women undergoing regional anaesthesia for caesarean section. *Cochrane Database Syst Rev*. May 18 2021;5(5):CD007579.

doi:10.1002/14651858.CD007579.pub3

7. Nicholson A, Lowe MC, Parker J, Lewis SR, Alderson P, Smith AF. Systematic review and meta-analysis of enhanced recovery programmes in surgical patients. *Br J Surg*. Feb 2014;101(3):172-88. doi:10.1002/bjs.9394

8. Qi Y, Zhou M, Zheng W, et al. Effect of S-Ketamine on Postoperative Nausea and Vomiting in Patients Undergoing Video-Assisted Thoracic Surgery: A Randomized Controlled Trial. *Drug Des Devel Ther*. 2024;18:1189-1198. doi:10.2147/DDDT.S449705

9. Gan TJ, Meyer TA, Apfel CC, et al. Society for Ambulatory Anesthesia guidelines for the management of postoperative nausea and vomiting. *Anesth Analg*. Dec 2007;105(6):1615-28, table of contents. doi:10.1213/01.ane.0000295230.55439.f4

10. Nakai A, Nakada T, Okamoto S, et al. Risk factors for postoperative nausea and vomiting after thoracoscopic pulmonary wedge resection: pitfalls of an increased fentanyl dose. *J Thorac Dis*. Jun 2021;13(6):3489-3496. doi:10.21037/jtd-21-296

11. Ramirez MF, Gorur A, Cata JP. Opioids and cancer prognosis: A summary of the clinical evidence. *Neurosci Lett*. Feb 16 2021;746:135661. doi:10.1016/j.neulet.2021.135661

12. Douville NJ, Bastarache L, He J, et al. Polygenic Score for the Prediction of Postoperative Nausea and Vomiting: A Retrospective Derivation and Validation Cohort Study. *Anesthesiology*. Jan 1 2025;142(1):52-71. doi:10.1097/ALN.0000000000005214

13. TJ G. Postoperative Nausea and Vomiting—Can It Be Eliminated? *JAMA*. 2002;287(10):1233–1236. doi:10.1001/jama.287.10.1233

14. Horn CC, Wallisch WJ, Homanics GE, Williams JP. Pathophysiological and neurochemical mechanisms of postoperative nausea and vomiting. *Eur J Pharmacol*. Jan 5 2014;722:55-66. doi:10.1016/j.ejphar.2013.10.037

15. Kovac AL. Comparative Pharmacology and Guide to the Use of the Serotonin 5-HT(3) Receptor Antagonists for Postoperative Nausea and Vomiting. *Drugs*. Dec 2016;76(18):1719-1735. doi:10.1007/s40265-016-0663-3

16. Weibel S, Schaefer MS, Raj D, et al. Drugs for preventing postoperative nausea and vomiting in adults after general anaesthesia: an abridged Cochrane network meta-analysis. *Anaesthesia*. Jul 2021;76(7):962-973. doi:10.1111/anae.15295

17. Gress K, Urits I, Viswanath O, Urman RD. Clinical and economic burden of postoperative nausea and vomiting: Analysis of existing cost data. *Best Pract Res Clin Anaesthesiol*. Dec 2020;34(4):681-686. doi:10.1016/j.bpa.2020.07.003

18. Apfel CC, Heidrich FM, Jukar-Rao S, et al. Evidence-based analysis of risk factors for postoperative nausea and vomiting. *Br J Anaesth*. Nov 2012;109(5):742-53. doi:10.1093/bja/aes276

19. Swaika S, Pal A, Chatterjee S, Saha D, Dawar N. Ondansetron, ramosetron, or palonosetron: Which is a better choice of antiemetic to prevent postoperative nausea and vomiting in patients undergoing laparoscopic cholecystectomy? *Anesth Essays Res*. Jul-Dec 2011;5(2):182-6. doi:10.4103/0259-1162.94761

20. Yang Q, Zou X, Xie YL, et al. Fosaprepitant Weekly vs Every 3 Weeks for the Prevention of Concurrent Chemoradiotherapy-Induced Nausea and Vomiting: A Pilot Randomized Clinical Trial. *JAMA Netw Open*. Jul 3 2023;6(7):e2326127. doi:10.1001/jamanetworkopen.2023.26127

21. Becherini C, Salvestrini V, Desideri I, et al. Impact of fosaprepitant in the prevention of nausea and emesis in head and neck cancer patients undergoing cisplatin-based chemoradiation: a pilot prospective study and a review of literature. *Radiol Med*. Mar 2024;129(3):457-466. doi:10.1007/s11547-024-01757-3

22. Zhao Y, Zhao B, Chen G, et al. Validation of different personalized risk models of chemotherapy-induced nausea and vomiting: results of a randomized, double-blind, phase III trial of fosaprepitant for cancer patients treated with high-dose cisplatin. *Cancer Commun (Lond)*. Feb 2023;43(2):246-256. doi:10.1002/cac2.12397

Note: This study protocol is provided as Supplementary Material 1 and includes all references cited within the document.

**Supplementary Material 2**

**Detailed Description of Interventions**

All patients underwent ultrasound-guided paravertebral nerve block 30 minutes prior to anesthesia induction. Anesthesia induction involved etomidate (0.2–0.3 mg kg-1), midazolam (0.03–0.05 mg kg-1), sufentanil (0.3–0.5 µg kg-1), and rocuronium (0.6–1.0 mg kg-1), with maintenance provided by sevoflurane and remifentanil. A single-lumen endotracheal tube (inner diameter, 7.5–8.0) and a 9F bronchial blocker were used, with placement confirmed via fiberoptic bronchoscopy. Intraoperative monitoring included electrocardiogram, heart rate, oxygen saturation, temperature, bispectral index (BIS), and end-tidal CO₂ (EtCO₂). A restrictive fluid management approach was implemented, with the infusion rate adjusted to ensure urine output remained above 0.5 ml kg-1 h-1. If urine output fell below this threshold, an additional 250 ml of crystalloid solution was administered. In the event of hypotension (defined as a systolic blood pressure<90 mmHg or a decrease of more than 20% from baseline), the first step in management involves administering 250-500 ml of crystalloid fluids, followed by the use of vasopressors (such as norepinephrine) to restore hemodynamic stability. All anesthesia procedures were performed by experienced anesthesiologists with at least 15 years of clinical experience and more than 500 thoracic anesthesia cases annually.
